# Supplementary material
Source: PubMed Central journal article supplement (PMC9617591)
Supplement: NIHMS1814285-supplement-Table_S5.pdf [file NIHMS1814285-supplement-Table_S5.pdf]

**Table S5: Quantitative PCR primers, related to Figures 1-4.**

All quantitative PCR (qPCR) primer sequences listed target human genes, unless indicated otherwise.

| <b>Primers</b>      | <b>Forward</b>             | <b>Reverse</b>             |
|---------------------|----------------------------|----------------------------|
| <i>HAND1</i>        | GTGCGTCCTTTAATCCTCTTC      | GTGAGAGCAAGCGGAAAAG        |
| <i>OCT4</i>         | AGTGAGAGGCAACCTGGAGA       | ACACTCGGACCACATCCTTC       |
| <i>NANOG</i>        | CATGAGTGTGGATCCAGCTTG      | CCTGAATAAGCAGATCCATGG      |
| <i>SOX2</i>         | TGGACAGTTACGCGCACAT        | CGAGTAGGACATGCTGTAGGT      |
| <i>BRACHYURY/T</i>  | TGCTTCCCTGAGACCCAGTT       | GATCACTTCTTTCTTTGCATCAAG   |
| <i>MIXL1</i>        | GGTACCCCGACATCCACTTG       | TAATCTCCGGCCTAGCCAAA       |
| <i>SOX17</i>        | CGCACGGAATTTGAACAGTA       | GGATCAGGGACCTGTCACAC       |
| <i>LMO2</i>         | ATTGGGGACCGCTACTTC         | GCCCAAAAAGCCTGAGATAGT      |
| <i>SCL</i>          | CAAAGTTGTGCGGCGTATCTT      | TCATTCTTGCTGAGCTTCTTGTC    |
| <i>ISL1</i>         | AGATTATATCAGGTTGTACGGGATCA | ACACAGCGGAAACACTCGAT       |
| <i>ETV2</i>         | CCGACGGCGATACCTACTG        | CGGTGGTTAGTTTTGGGGCAT      |
| <i>FLI1</i>         | ACCTCCACACCCGACCAAT        | GGACTIONTTGTTGAGGCCAGAA    |
| <i>GATA2</i>        | ACTGACGGAGAGCATGAAGAT      | CCGGCACATAGGAGGGGTA        |
| <i>FLK1</i>         | TTTTTGCCCTTGTTCTGTCC       | TCATTGTTCCAGCATTTC         |
| <i>DLL3</i>         | CACTCCCGGATGCACTCAAC       | GATTCCAATCTACGGACGAGC      |
| <i>CDX2</i>         | GGGCTCTCTGAGAGGCAGGT       | CCTTTGCTCTGCGGTTCTG        |
| <i>FOXF1</i>        | AGCAGCCGTATCTGCACCAGAA     | CTCCTTTCGGTCACACATGCTG     |
| <i>JAG1</i>         | ATG GGC CCC GAA TGT AAC AG | ATC ACA GTA CAG GCC TTG CC |
| <i>ESAM1</i>        | GGGGTCACAACAAGCAAACC       | TTGTCTTGACATTACAGGAG       |
| <i>AA4.1/CD93</i>   | CCGGAAGTAACATTGAGGGCT      | TCTGAGTCTCGTCCTTGTCAC      |
| <i>SOX7</i>         | TCGACGCCCTGGATCAACT        | CTGGGAGACCGGAACATGC        |
| <i>SOX18</i>        | AAGCGTGGAAGGAGCTGAAC       | CGCGGCCGGTACTTGTAGTT       |
| <i>NOTCH1</i>       | GAGGCGTGGCAGACTATGC        | CTTGACTCCGTCAGCGTGA        |
| <i>APELIN</i>       | CTCTGGACCGTGTTTCGGAG       | GGTACGTGTAGGTAGCCCACA      |
| <i>APLNR</i>        | CTCTGGACCGTGTTTCGGAG       | GGTACGTGTAGGTAGCCCACA      |
| <i>AQP1</i>         | TAACCCTGCTCGGTCCTTTG       | AGTCGTAGATGAGTACAGCCAG     |
| <i>CD31/PECAM1</i>  | AACAGTGTTGACATGAAGAGCC     | TGTA AACAGCACGTCATCCTT     |
| <i>CD34</i>         | TGGCTGTCTTGGGCATCACTGG     | CTGAATGGCCGTTTCTGGAGGTGG   |
| <i>CD73</i>         | CCAGTACCAGGGCACTATCTG      | TGGCTCGATCAGTCCTTCCA       |
| <i>CD144/VE-CAD</i> | AACGAGCAGGGCGAGTTCACCTTC   | TAGGTGACCAGCTGCTCGTGGATC   |
| <i>CXCR4</i>        | CACCGCATCTGGAGAACCA        | GCCCATTTCTCGGTGTAGTT       |
| <i>DLL4</i>         | GTCTCCACGCCGGTATTGG        | CAGGTGAAATTGAAGGGCAGT      |
| <i>EFNB2</i>        | AAGGACTGGTACTATACCCACAG    | TGTCTGCTTGGTCTTTATCAACC    |
| <i>GJA4/CX37</i>    | TGCAAGAGTGTGCTAGAGGC       | ACAAAGCAGTCCACGAGGTAG      |

|                            |                               |                         |
|----------------------------|-------------------------------|-------------------------|
| <i>ICAM1</i>               | TTGGGCATAGAGACCCCGTT          | GCACATTGCTCAGTTCATACACC |
| <i>IFIT1</i>               | AGAAGCAGGCAATCACAGAAAA        | CTGAAACCGACCATAGTGGAAT  |
| <i>IFIT2</i>               | AAGCACCTCAAAGGGCAAAC          | TCGGCCCATGTGATAGTAGAC   |
| <i>IFIT3</i>               | AGAAAAGGTGACCTAGACAAAGC       | CCTTG TAGCAGCACCCAATCT  |
| <i>KLF2</i>                | CTACACCAAGAGTTCGCATCTG        | CCGTGTGCTTTCGGTAGTG     |
| <i>KLF4</i>                | AGCCTAAATGATGGTGCTTGGT        | CCTTG TCAAAGTATGCAGCAGT |
| <i>MX1</i>                 | AGCGGGATCGTGACCAGAT           | TGACCTTGCCCTCTCCACTTATC |
| <i>NOS3</i>                | TGATGGCGAAGCGAGTGAAG          | ACTCATCCATACACAGGACCC   |
| <i>NR2F2</i>               | GCCATAGTCCTGTTACCTCA          | AATCTCGTCGGCTGGTTG      |
| <i>SELE</i>                | AGAGTGGAGCCTGGTCTTACA         | CCTTTGCTGACAATAAGCACTGG |
| <i>SOX17</i>               | CGCACGGAATTTGAACAGTA          | GGATCAGGGACCTGTCACAC    |
| Nipah virus <i>P</i> gene  | GTTCAGGCTAGAGAGGCAAATTT       | CCCCTTCATCGATATCTTGATCA |
| Nipah virus probe          | CTGCAGGAGGTGTGCTCATTGGAG<br>G |                         |
| Hendra virus <i>P</i> gene | CATCGGAAAGAAACCCACCTAA        | GGTTTGGGTTCTGGTCATCT    |
| Hendra virus probe         | TCCTGAGTCTGCCTGAGGGCGGT       |                         |
