# Supplementary material
Source: PubMed Central journal article supplement (PMC9617591)

**Figure S1**

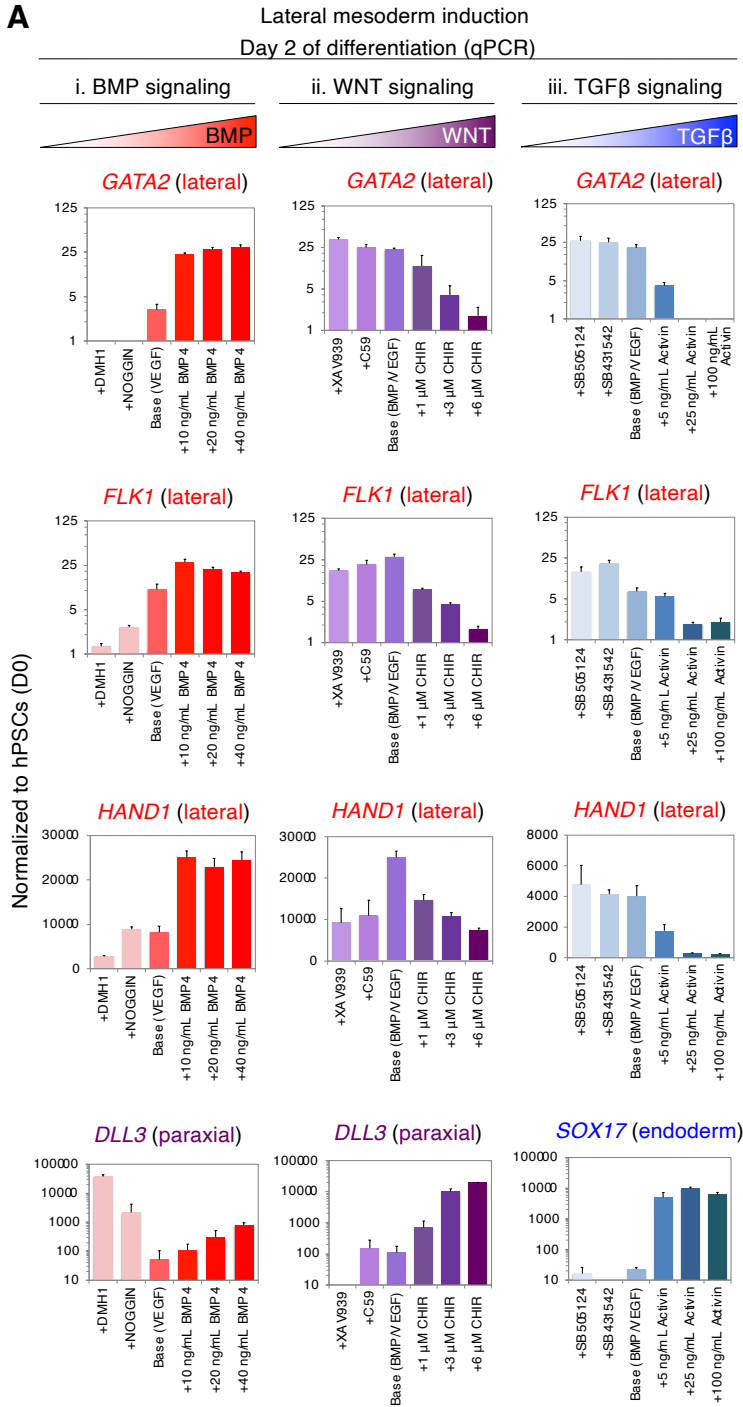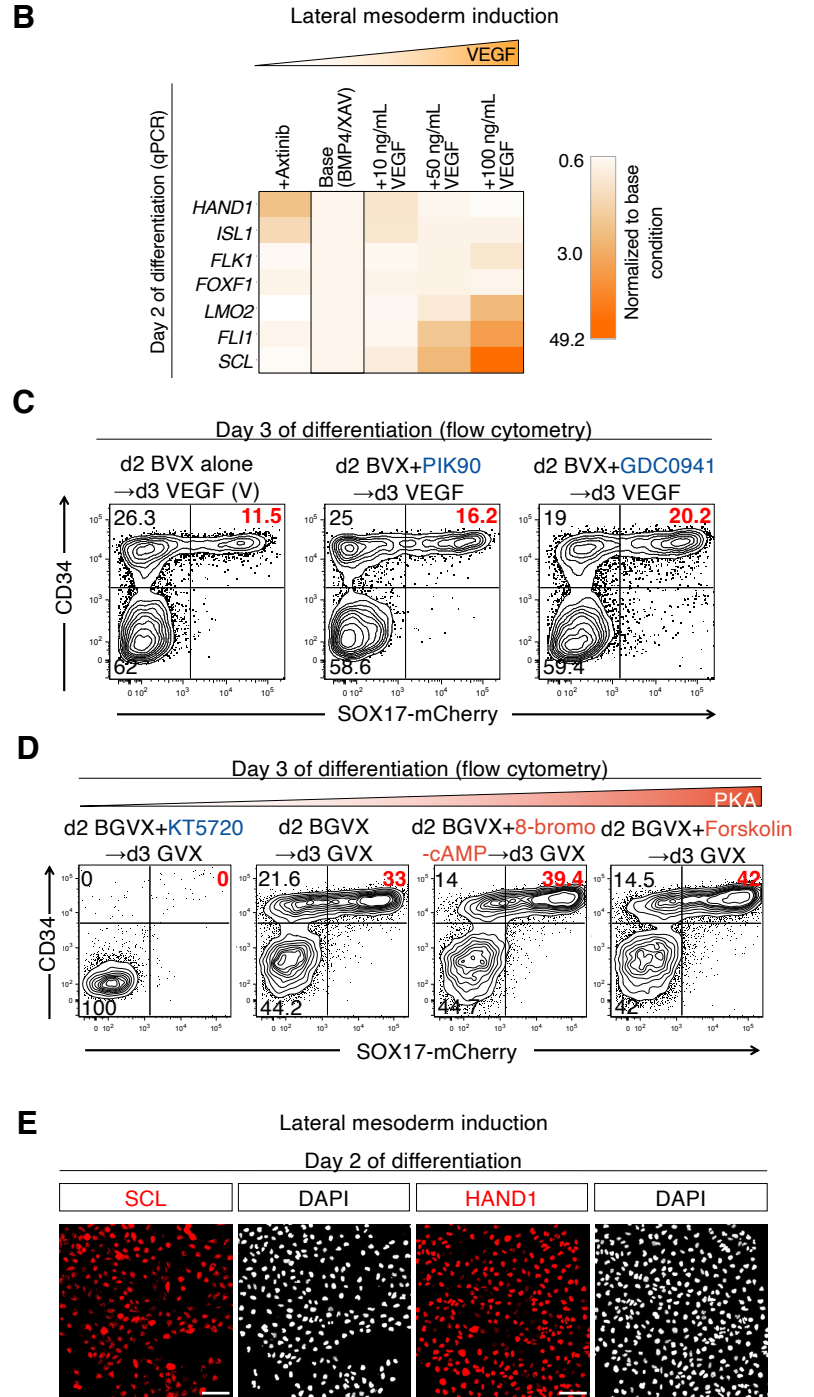

Supplement: NIHMS1814285-supplement-1.pdf [file NIHMS1814285-supplement-1.pdf]

**Figure S2**

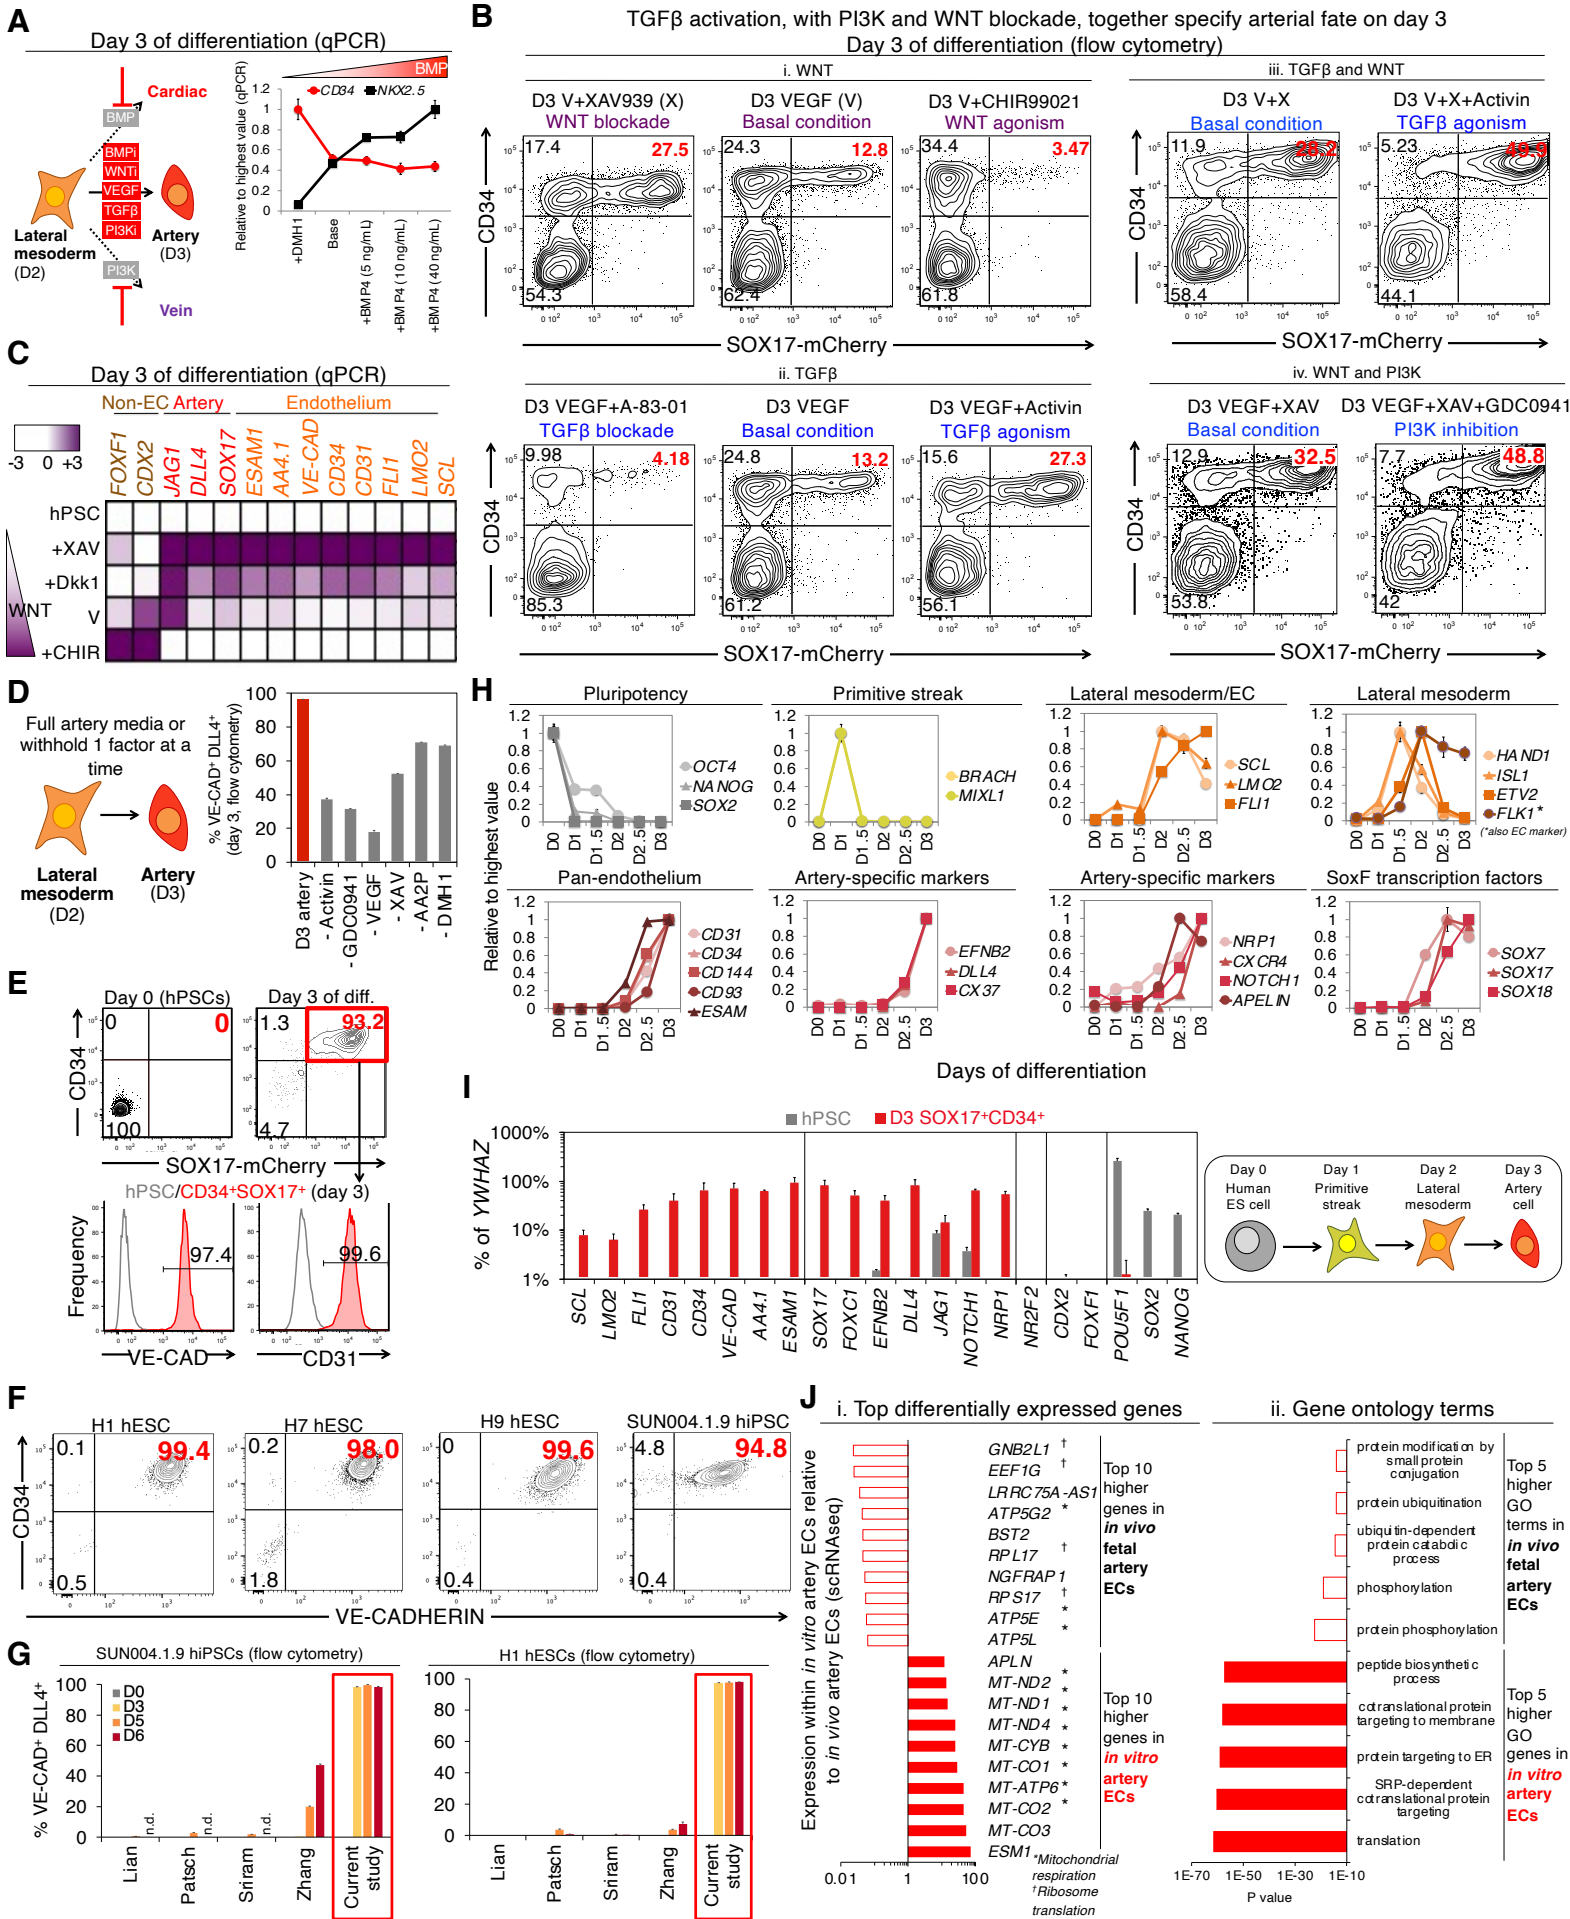

Supplement: NIHMS1814285-supplement-2.pdf [file NIHMS1814285-supplement-2.pdf]

**Figure S3**

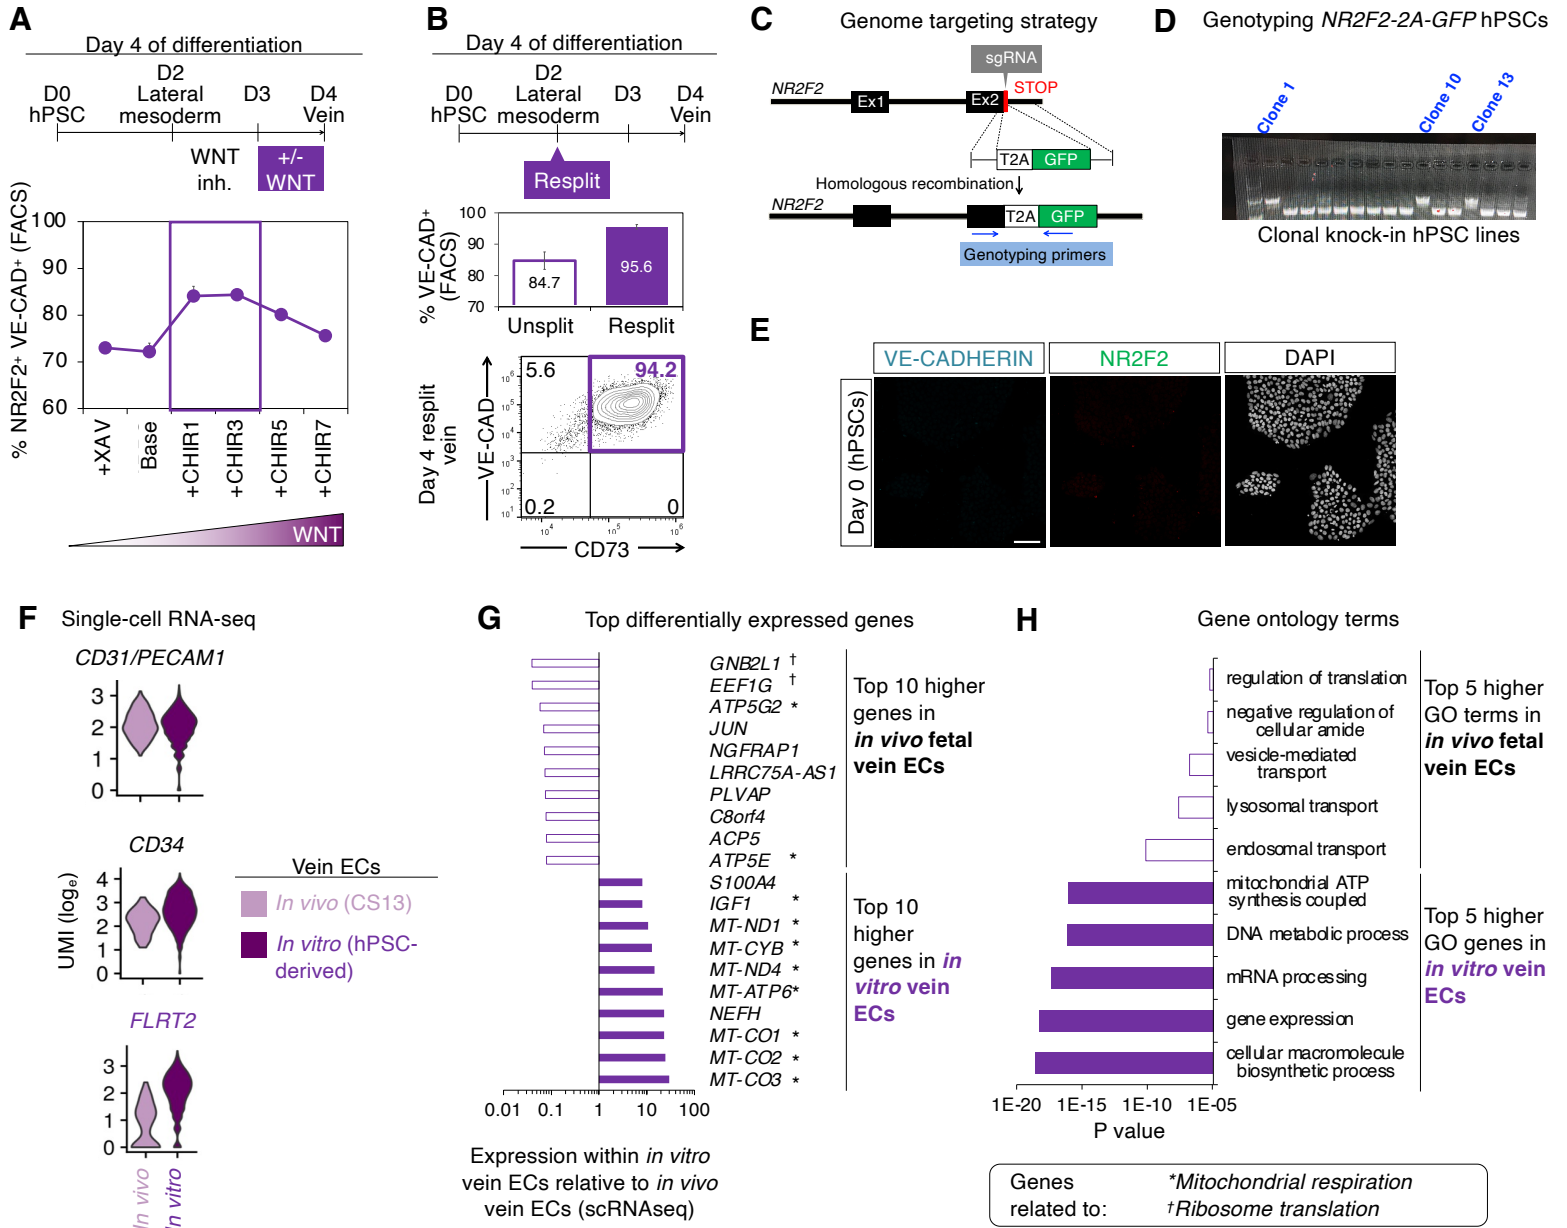

Supplement: NIHMS1814285-supplement-3.pdf [file NIHMS1814285-supplement-3.pdf]

**Figure S4**

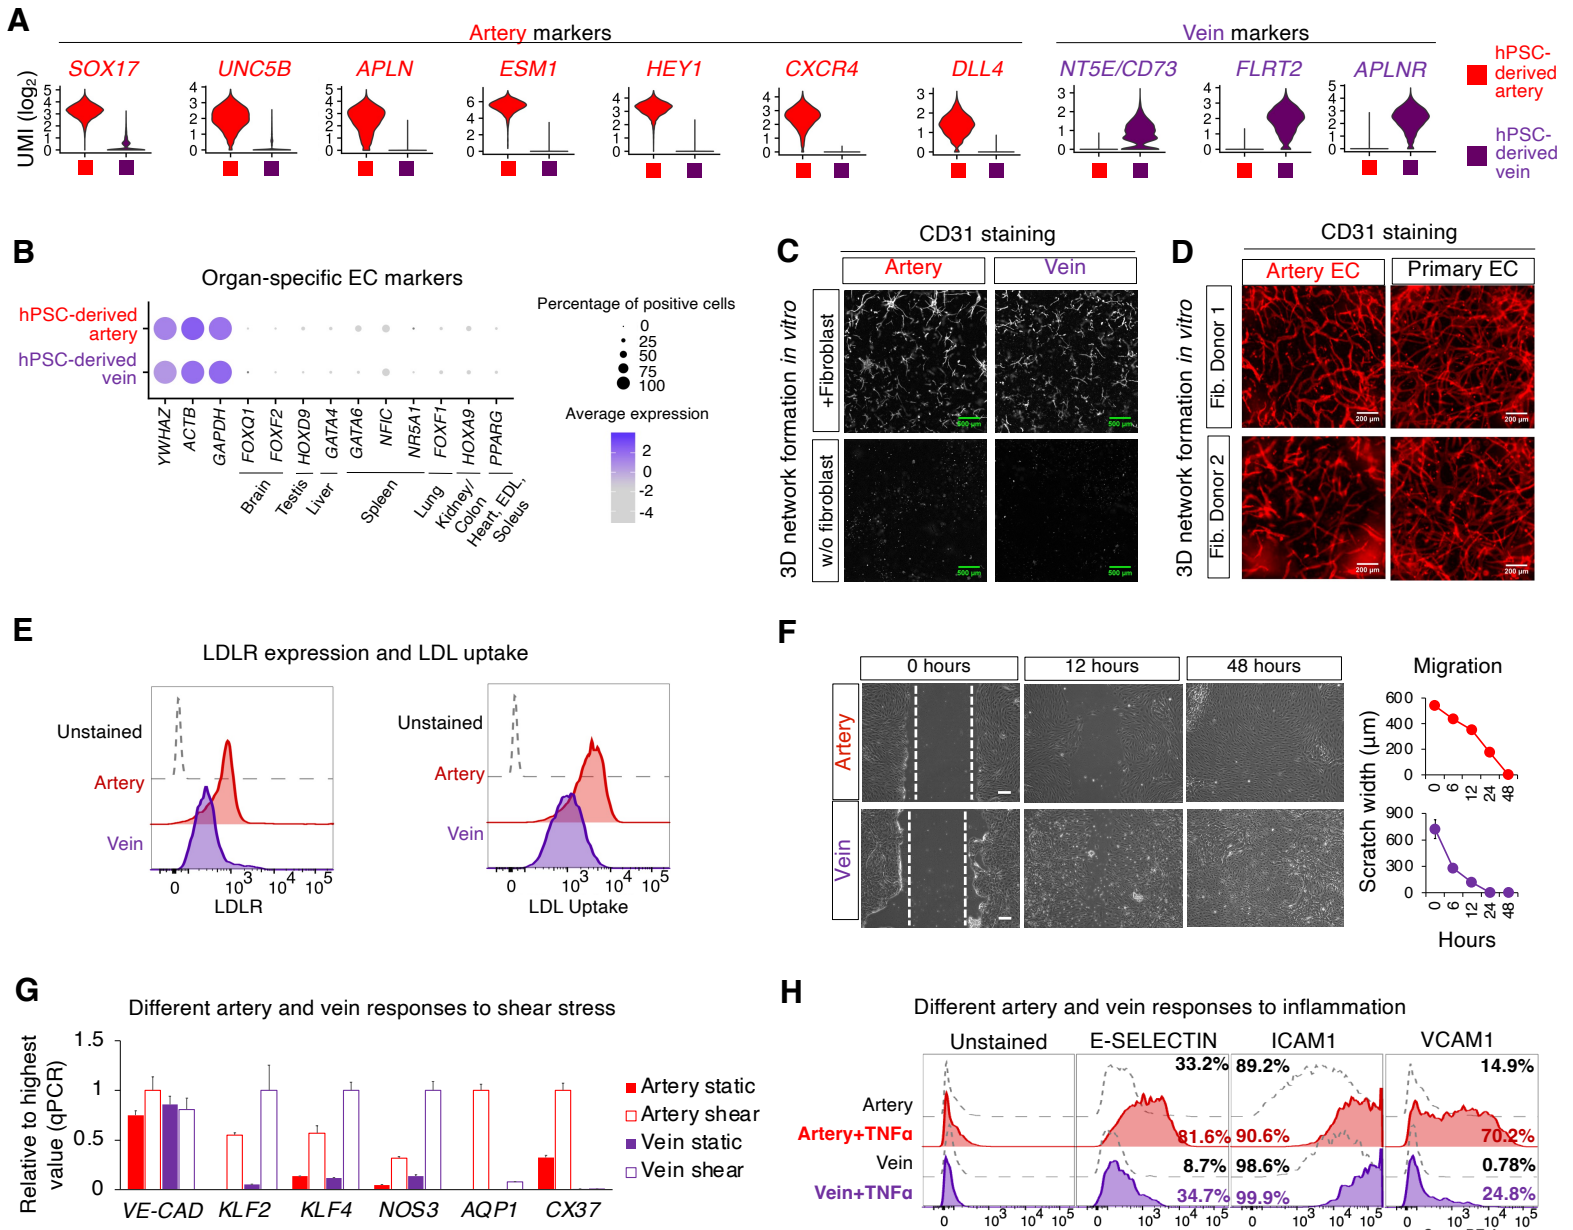

Supplement: NIHMS1814285-supplement-4.pdf [file NIHMS1814285-supplement-4.pdf]

**Figure S5**

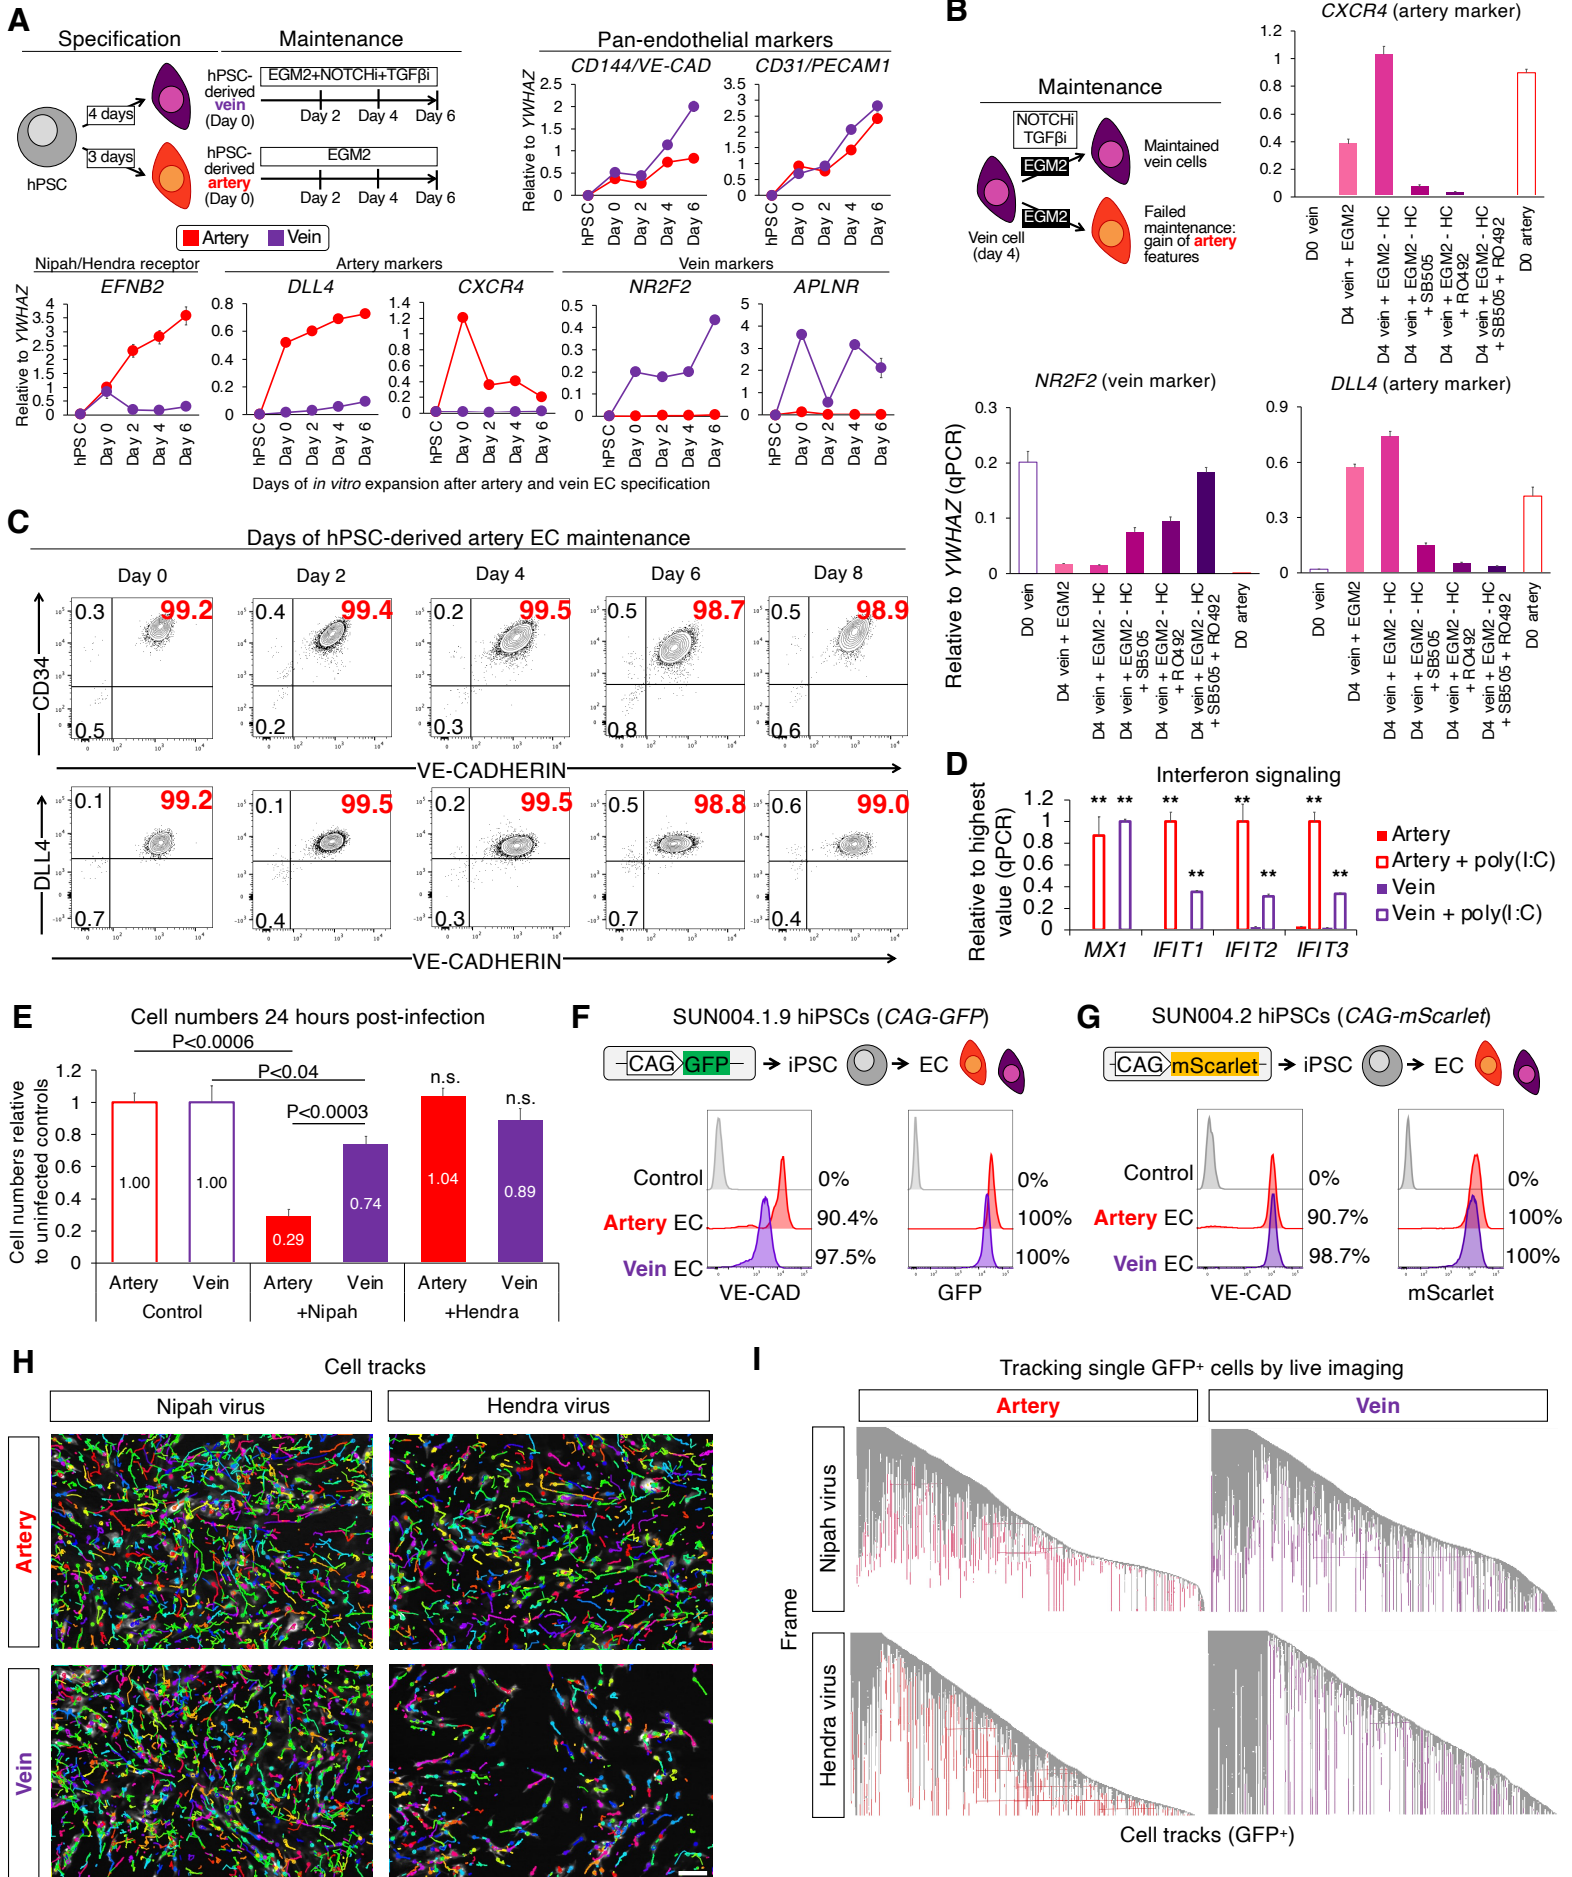

Supplement: NIHMS1814285-supplement-5.pdf [file NIHMS1814285-supplement-5.pdf]

**Figure S6**

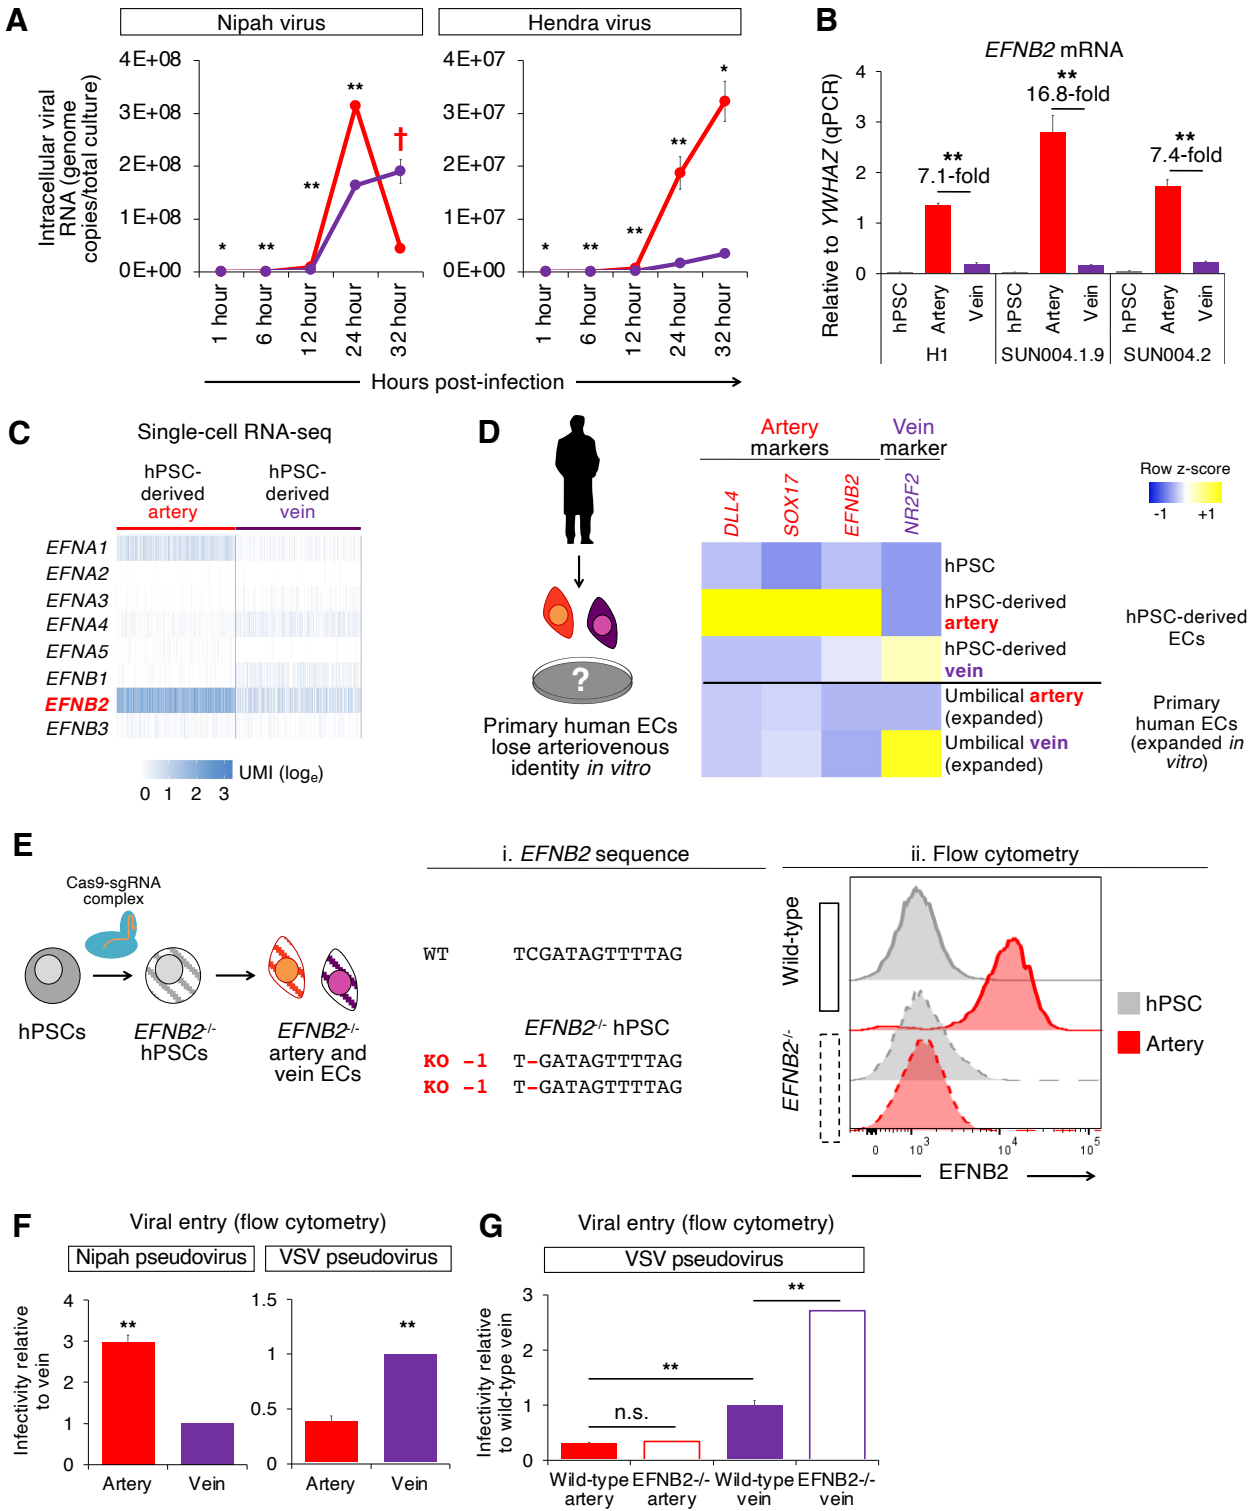

Supplement: NIHMS1814285-supplement-6.pdf [file NIHMS1814285-supplement-6.pdf]

**Figure S7**

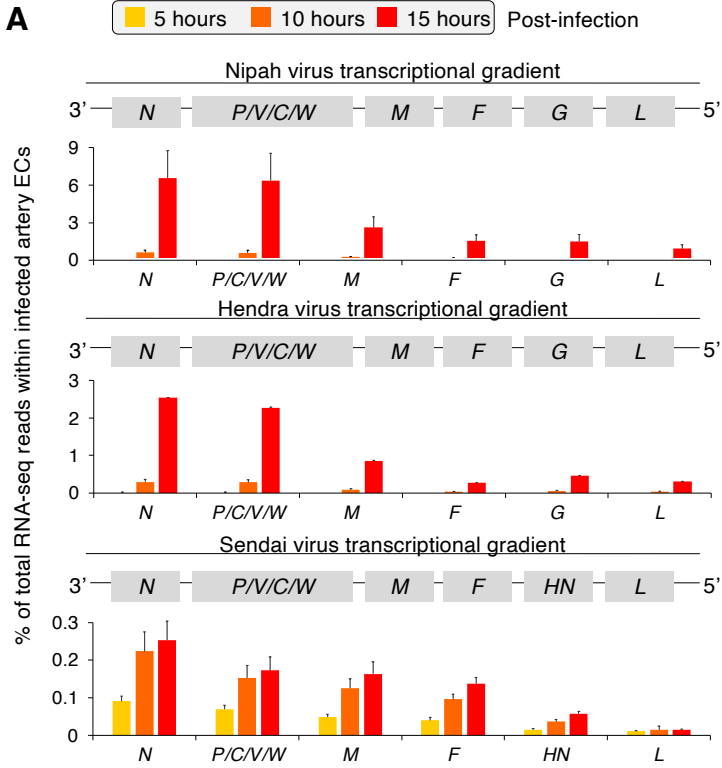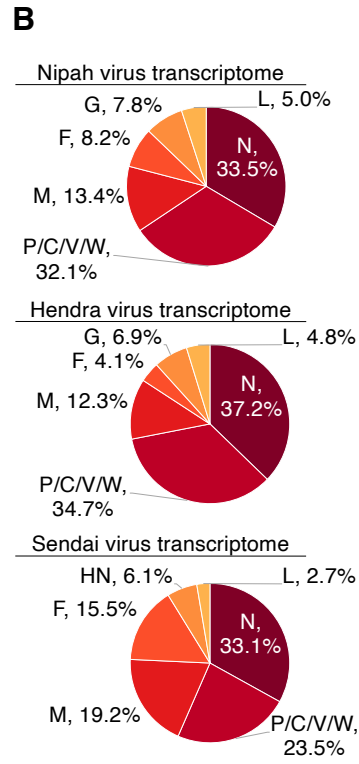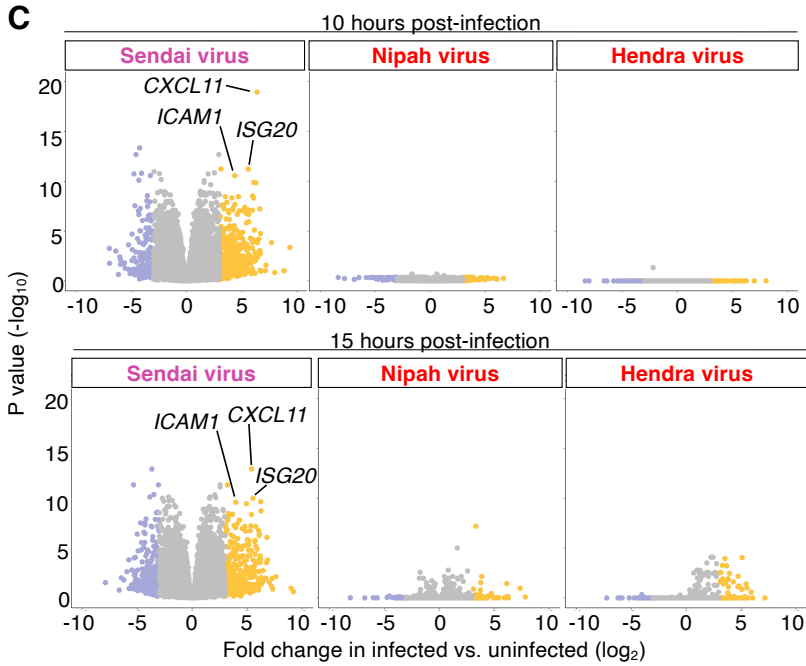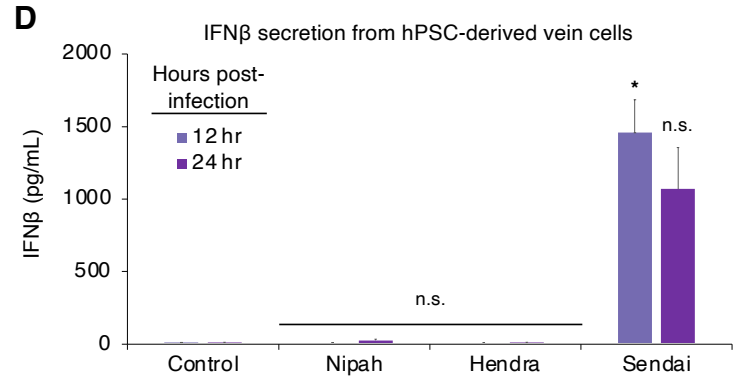

Supplement: NIHMS1814285-supplement-7.pdf [file NIHMS1814285-supplement-7.pdf]
